# Supplementary material
Source: Research Square preprint supplement (doi:10.21203/rs.3.rs-9612899/v1)
Supplement: Supplementary file 1 [file 1a42da8b4d4501ecebee45e4.doc]

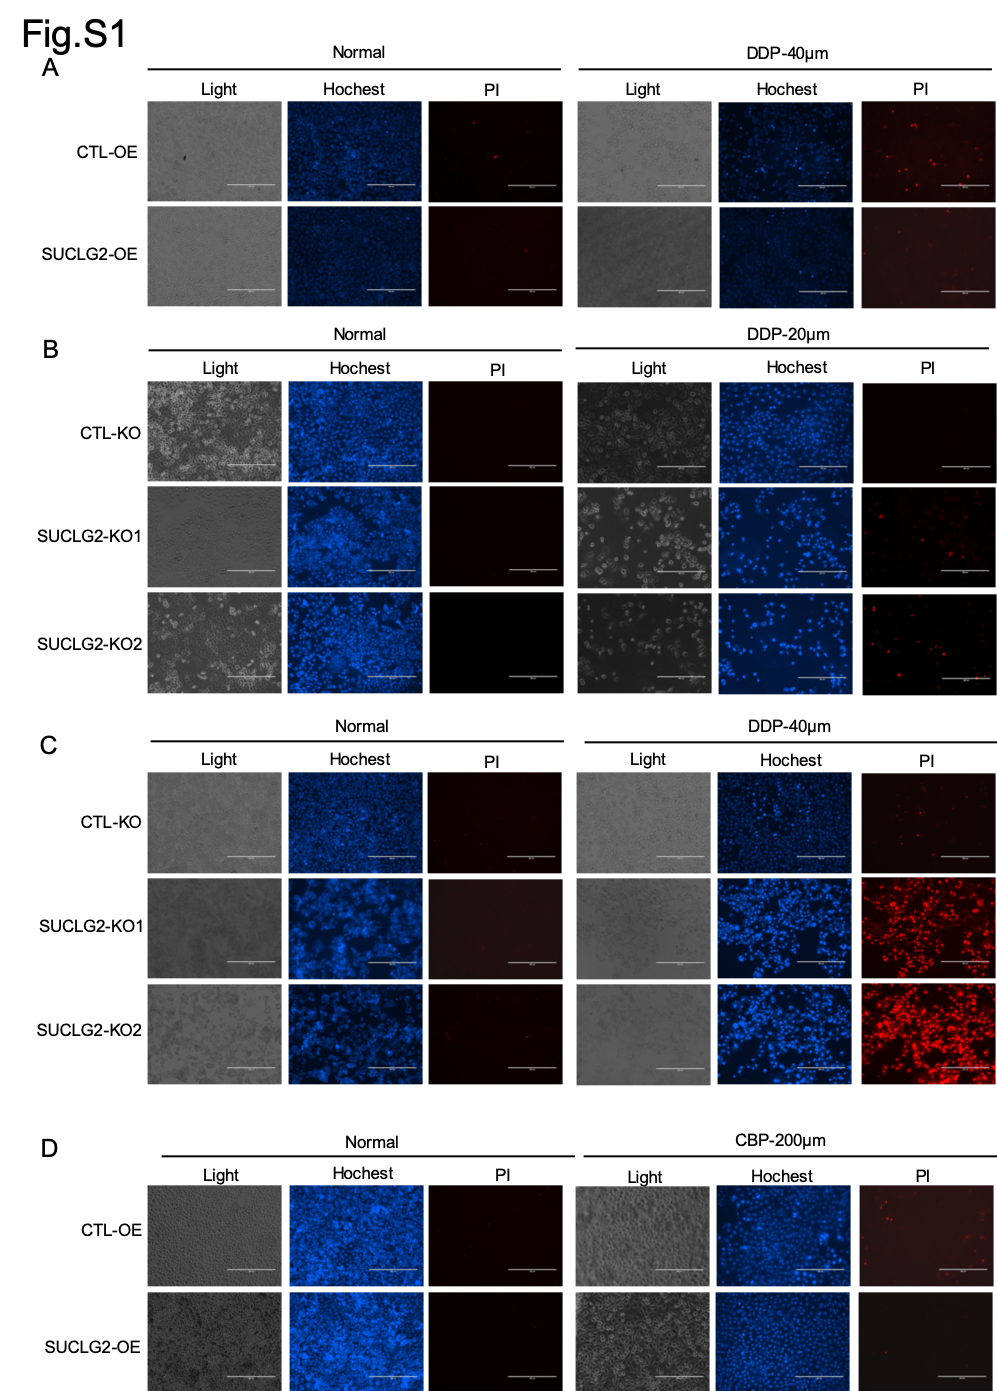


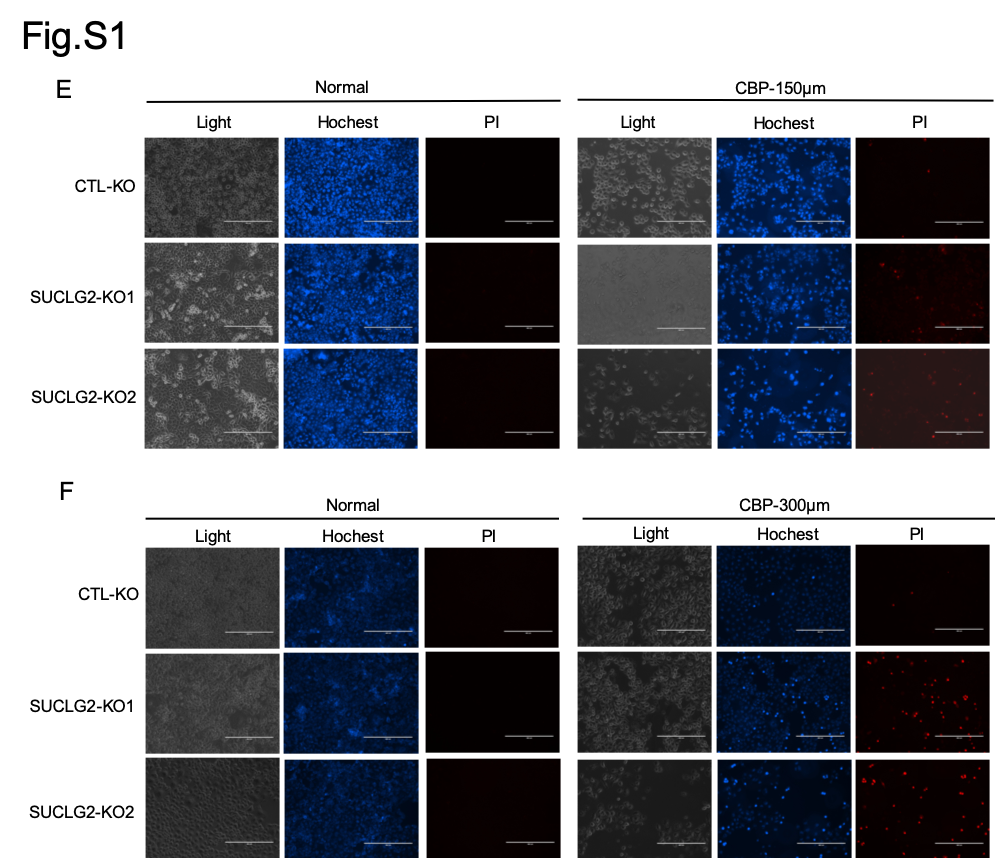


**Figure S1. SUCLG2 confers resistance to platinum-based drugs as assessed by PI staining assay.** (A) SUCLG2-OE and CTL-OE H1299 cells were treated with DDP (40 μM) for 24 h. Cell death was analyzed using PI staining assay. (B and C) SUCLG2-KO A549 (B) and H1299 (C) cells were treated with the indicated concentrations of DDP for 24 h. Cell death was analyzed using PI staining assay. (D) SUCLG2-OE and CTL-OE A549 cells were treated with CBP (200 μM) for 24 h, followed by cell death analysis using PI staining assay. (E and F) SUCLG2-KO A549 (E) and H1299 (F) cells were treated with the indicated concentrations CBP for 24 h. Cell death was analyzed using PI staining assay.


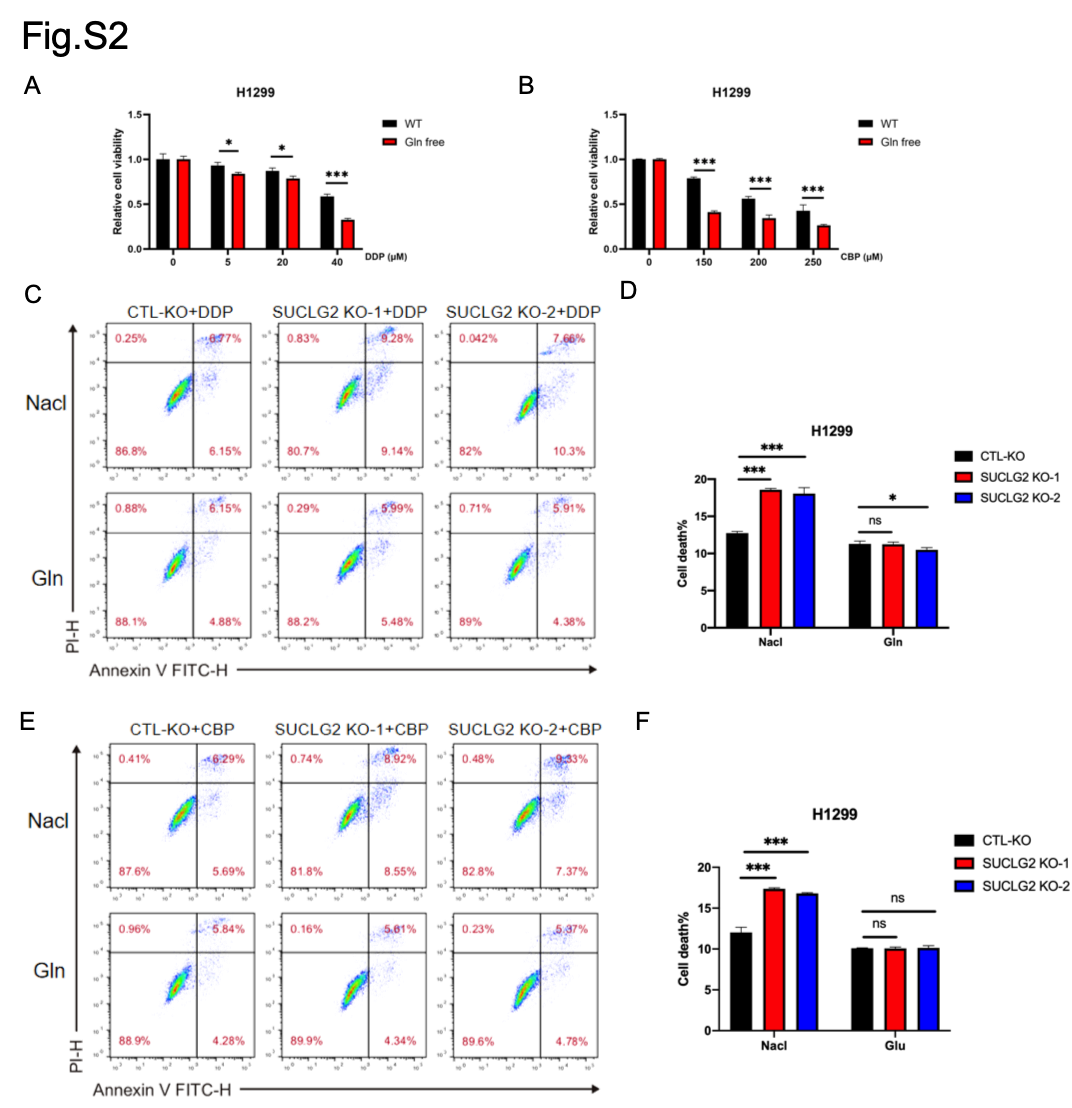


**Figure S2. Glutamine metabolism is critical for platinum resistance in cancer cells.** (A and B)H1299 cells cultured under glutamine-deprived or normal conditions were treated with indicated doses of DDP (A) or CBP (B), followed by cell viability analysis using CCK-8 assay. (C and D) Apoptosis levels in SUCLG2-KO and CTL-KO H1299 cells treated with DDP and supplemented with glutamine were assessed by flow cytometry. Data represent mean ± SD of three independent experiments. ns: not significant (*p* > 0.05); **p* < 0.05; ****p* < 0.001. (E and F) Apoptosis levels in SUCLG2-KO and CTL-KO H1299 cells treated with CBP and supplemented with glutamine were assessed by flow cytometry. Data represent mean ± SD of three independent experiments. ns: not significant (*p* > 0.05); ****p* < 0.001.

**Figure S3. K311 site of GAC is a critical residue mediating platinum resistance.** (A) A549 cells overexpressing the GAC-WT or GAC-K164R plasmids were prepared, and co-IP and western blot were used to detect the succinylation of protein. (B) A549 cells overexpressing SIRT5 and GAC-K311R plasmids were prepared, and co-IP and western blot were used to detect the succinylation of protein. (C) A549 and H1299 cells overexpressing the GAC-WT or GAC-K164R plasmids were prepared, and co-IP and GLS activity kit were used to detect the activity of GAC. (D and E) H1299 cells overexpressing GAC-WT or GAC-K311R were treated with indicated concentrations of DDP (C) or CBP (D) for 24 h, followed by cell viability analysis using CCK-8 assay.
