# Supplementary material
Source: Research Square preprint supplement (doi:10.21203/rs.3.rs-9612899/v1)
Supplement: Supplementary file 2 [file 8bbb2e54752220270b52cc6e.xlsx]

## Sheet: shee1
Index	Compounds	物质	Class	物质类别	SUCLG2-sh1	SUCLG2-sh2	SUCLG2-sh3	SUCLG2-sh4	SUCLG2-sh5	SUCLG2-sh6	WT-1	WT-2	WT-3	WT-4	WT-5	WT-6	VIP	Pvalue	FDR	Fold_Change	Log2FC	Type
L-Aspartate	L-Aspartate	L-天冬氨酸	Amino Acid metabolomics	氨基酸及其代谢物	2179.9148804720003	1456.3954111560001	1678.383073361	1778.332673115	2025.073467717	1458.5742872479998	756.003431725	628.294824929	720.399956488	671.37047742	603.518954737	638.540660725	1.235678871940665	2.0242288190311806e-4	6.285763174886297e-4	2.6322389400090564	1.396290454848189	up
Glutamine	Glutamine	谷氨酰胺	Amino acid derivatives	氨基酸衍生物	180.585055767	171.18760542200002	159.96787565399998	188.113325545	207.010664083	136.567708266	96.500838116	82.323554235	98.82635354899999	97.973381574	69.211162545	70.72248384699999	1.2115234973037219	5.895292983072121e-5	2.89851905001046e-4	2.0238900228632795	1.0171308968600268	up
L-citrulline	L-citrulline	L-瓜氨酸	Amino acids	氨基酸	880.528196576	831.826284323	728.025328394	900.352534716	965.5457517469999	716.1333774560001	75.706031598	62.298192488000005	65.774924803	76.399860458	52.733755815	52.476995443	1.2959632294254644	6.068170114719073e-6	4.703831806745986e-5	13.032031430538323	3.7039900833467865	up
L-Cystine	L-Cystine	胱氨酸	Amino acids	氨基酸	4.551666745	2.2037657019999997	3.167976991	3.52250321	2.407456032	2.161672819	29.337012626999996	18.725740966	34.344481833	31.498726855	21.545717987	23.670170316999997	1.2552608273337291	1.8921741647923883e-4	6.202126429041717e-4	0.11321538451676498	-3.142858079668486	down
L-Asparagine	L-Asparagine	L-天冬酰胺	Amino acids	氨基酸	794.281089469	741.9336116810001	725.38429046	768.6075612960001	844.639456116	634.2406687519999	216.693417103	187.27708707	203.455666576	206.555288165	154.86604268	170.888024121	1.2937627025201388	1.4781446454151191e-6	3.060475082632483e-5	3.9562570228257785	1.9841361554981811	up
Arginine	Arginine	精氨酸	Amino acids	氨基酸	22.614479592	11.880224845999999	16.223459325	16.416923945	11.616333394000002	7.751817505	399.58942909300004	365.005832092	446.68779725400003	386.568201645	352.630565569	352.337384965	1.309033739530398	1.3266609435492793e-6	3.060475082632483e-5	0.0375640598307261	-4.73450319544295	down
Ornithine	Ornithine	鸟氨酸	Amino acids	氨基酸	43.775455007	40.749494249	38.954339075	49.89970361100001	48.41622427	36.283046945	0.0	0.0	0.0	3.030198957	0.0	0.0	1.297440663184165	3.0909978115803814e-6	3.64737741766485e-5	85.1687518936071	6.412252302835703	up
Xyluose-5-phosphate	Xyluose-5-phosphate	D-木酮糖5-磷酸	Carbohydrate metabolomics	碳水化合物及其代谢物	1006.739223449	677.4794045140001	728.725446062	828.8865355419999	890.5071051960001	564.8549147809999	121.668320596	119.640077948	143.58836062	110.83215859999999	103.484734911	123.16450457100001	1.2580376283752353	1.422076870459376e-4	4.935443256300188e-4	6.502401245701577	2.7009725836079457	up
dUMP	dUMP	脱氧尿苷酸	Nucleotide and Its metabolomics	核苷酸及其代谢物	0.0	0.0	0.0	0.0	0.0	0.0	9.852742585	15.819531845999999	8.550563109	11.504503983	11.298556037	7.946513513999999	1.2344483683849863	2.3290017045312915e-4	6.543385741302199e-4	0	-Inf	down
UMP	UMP	尿苷5-单磷酸	Nucleotide and Its metabolomics	核苷酸及其代谢物	3.1470969419999997	3.2751375360000003	3.048866874	3.7171248689999996	3.7320832110000004	2.506217378	8.62519831	6.9717055089999995	7.729926312000001	6.568806299999999	7.478061195	8.148543953999999	1.2669293516621314	1.556173770830076e-6	3.060475082632483e-5	0.42674802768357	-1.2285436093735593	down
dAMP	dAMP	脱氧腺苷酸	Nucleotide and Its metabolomics	核苷酸及其代谢物	12.407046578	16.564421192	9.63985778	13.179375285	25.209946893	10.26562259	45.721640836999995	65.88236029	35.935840956999996	58.434080333000004	52.7991811	34.200955593	1.1539937956178419	4.969028602554942e-4	0.0012746638589162679	0.2978634715411272	-1.7472768852231475	down
dCMP	dCMP	脱氧胞苷酸	Nucleotide and Its metabolomics	核苷酸及其代谢物	3.9474648660000002	4.710745221	1.5889205130000001	2.970402736	8.215950813	1.808914045	18.877657443	29.917866453000002	12.792326829	26.531730377	22.027863274	10.835682539	1.0989677666583553	0.0022791833810661562	0.004337800628480749	0.19211272502759483	-2.379975012499281	down
UDP-GlcNAc	UDP-GlcNAc	尿苷二磷酸-N-乙酰氨基葡萄糖	Nucleotide and Its metabolomics	核苷酸及其代谢物	120.456135264	77.280154555	90.69157902799999	102.836133449	93.180296714	72.838508822	469.86833569	459.594650433	641.207700573	331.80980469599996	428.611780315	534.012538485	1.2533252349905422	2.1934683712990835e-4	6.470731695332296e-4	0.194506953410425	-2.3621063639873348	down
Cyclic-AMP	Cyclic-AMP	环腺苷酸	Nucleotide and Its metabolomics	核苷酸及其代谢物	0.5486083039999999	0.29685276	0.44500726700000004	0.462720022	0.37654765100000004	0.26775092899999997	0.095130785	0.09003421800000001	0.133380583	0.088690639	0.091259483	0.10770465	1.1978348988250396	8.664282581436644e-4	0.0020447706892190477	3.954941466728728	1.983656342919284	up
Guanosine	Guanosine	鸟苷	Nucleotide and Its metabolomics	核苷酸及其代谢物	74.931260033	51.542599638999995	72.143313135	84.543847103	59.133605947	38.479943432	24.437063441	22.245213291	28.778589244000003	19.284994894	26.49514076	29.77223026	1.1475893394823702	0.0021508185574823716	0.004299880395944885	2.5214649373662903	1.3342621638082333	up
Adenine	Adenine	腺嘌呤	Nucleotide and Its metabolomics	核苷酸及其代谢物	233.770771817	235.32887908400002	203.14711292	198.239604558	260.35222227	226.381681668	20.660139007999998	10.701246158	19.647032459000002	18.954976051	16.326293852	19.436583348	1.2935308453284386	2.199827380370406e-6	3.244745386046349e-5	12.837114759384658	3.682249076936987	up
Inosine	Inosine	肌苷	Nucleotide and Its metabolomics	核苷酸及其代谢物	192.53065054200002	117.040014624	178.46761854099998	219.901805442	126.59214384200001	89.82963609999999	440.252685514	459.14926911	547.180649988	340.63461546	473.535026605	507.402434365	1.237379967363691	1.0627898961267305e-5	6.9671782079419e-5	0.3339271014808493	-1.5823949077896065	down
D-Fructose-6-phosphate	D-Fructose-6-phosphate	果糖-6-磷酸	Phosphate sugars	磷酸糖	63.95164157399999	44.299486905	55.814836158999995	49.98204990399999	74.071510302	81.982624195	464.53764529	380.07632662099996	1169.716045692	805.3030491489999	828.938354791	818.3055773410001	1.1851076396966178	0.002038758757388573	0.004295955953068779	0.08285478850916779	-3.593271110809652	down
D-Glucose-1-phosphate	D-Glucose-1-phosphate	D-葡萄糖1-磷酸	Phosphate sugars	磷酸糖	74.13227217800001	56.871914893	78.694612221	71.709317587	97.817700762	98.61350941100001	517.39598229	443.497571152	1152.5841120510001	870.9806943210001	876.4058634510001	925.7654040369999	1.2069215849247308	0.0011980946212241366	0.0026180586167490394	0.09982792993351687	-3.324412679430066	down
D-Ribulose-5-phosphate	D-Ribulose-5-phosphate	D-核酮糖5-磷酸	Phosphate sugars	磷酸糖	1022.428439497	683.51310857	744.8836072839999	829.6388962460001	930.661803426	597.1664815080001	127.346272966	125.318209879	155.50825768299998	115.85717787899999	112.251723035	129.061345202	1.2575590842922757	1.2808937775615008e-4	4.935443256300188e-4	6.282532695066796	2.65134627408651	up
D-Glucose-6-phosphate	D-Glucose-6-phosphate	葡萄糖-6-磷酸	Phosphate sugars	磷酸糖	234.86393247200002	183.462674476	194.778973826	214.434375403	295.744701672	222.72009083900002	759.193566227	621.849274102	1096.003646997	955.088845575	835.3734685969999	866.179796787	1.262806299031318	1.3541831997962434e-4	4.935443256300188e-4	0.2621905717338712	-1.9313122871207857	down
6-Phosphogluconic-acid	6-Phosphogluconic-acid	6-磷酸葡萄糖酸	Phosphate sugars	磷酸糖	29.490932243000003	14.616085661	36.044345046	30.238864876999997	58.09550358	21.161929836	332.809929579	267.978455021	295.804410254	296.902362762	244.43569842099998	224.93991062599997	1.2879758673248198	4.103139637782761e-6	4.034753977153049e-5	0.11404834641694937	-3.1322825656714306	down
