# Supplementary material
Source: Research Square preprint supplement (doi:10.21203/rs.3.rs-9612899/v1)
Supplement: Supplementary file 4 [file 7f56f926f3e604ec42204b6f.docx]

| **Primer sequences for construct plasmids** | |
| --- | --- |
| Name sequence | |
| pcDNA3.1-SUCLG2-F | 5'-GCTGGCTAGTTAAGCTTGGTACCATGGCGTCCCCCGTA |
| pcDNA3.1-SUCLG2-R | 5'-ACCGCGGGCCCTCTAGACTCGAGCGCTTCTTGGCCACACTG |
| GAC-Myc-F | 5’-TCTGAGGAAGATCTGGAATTCATGATGCGGCTGCGAGG |
| GAC-Myc-R | 5'-GGTTTAAACGGGCCCTCTAGATTACAACAATCCATCAAGATTCTTATGG |
| GAC-K164-F | 5'- TTTATTACAGCACTCCGTTCTACAGGATTGCGA |
| GAC-K164-R | 5- TCGCAATCCTGTAGAACGGAGTGCTGTAATAAA |
| GAC-K311-F | 5'- CATCGATATGTTGGACGTGAGCCGAGTGGACTA |
| GAC-K311-R | 5'- TAGTCCACTCGGCTCACGTCCAACATATCGATG |

| **Primer sequences for sgRNA** | |
| --- | --- |
| SUCLG2-1-F | 5'-CACCGCACTGCAAATGAAGCTCTCG |
| SUCLG2-1-R | 5'-AAACCGAGAGCTTCATTTGCAGTGC |
| SUCLG2-2-F | 5'-CACCGAAGAAACTGATGTCTGACAA |
| SUCLG2-2-R | 5'-AAACTTGTCAGACATCAGTTTCTTC |
| GAC-1-F | 5'- CACCGGCTGCGACACTGGCTAATGG |
| GAC-1-R | 5'- AAACCCATTAGCCAGTGTCGCAGCC |
| GAC-2-F | 5'- CACCGGAATATGTGCATCGATATGT |
| GAC-2-R | 5'-AAACACATATCGATGCACATATTCC |
| SIRT5-1-F | 5'- CACCGGTGCAGCTCATCGATGTTCT |
| SIRT5-1-R | 5'-AAACAGAACATCGATGAGCTGCACC |
| SIRT5-2-F | 5'-CACCGAACTTGGCCGAGCCATTTTC |
| SIRT5-2-R | 5'-AAACGAAAATGGCTCGGCCAAGTTC |
| **Primer sequences for shRNA** | |
| SIRT5-1-F | 5'-CCGGGATTGATTTCCCAGCTATATTCTCGAGAATATAGCTGGGAAATCAATCTTTTTG |
| SIRT5-1-R | 5'-AATTCAAAAAGATTGATTTCCCAGCTATATTCTCGAGAATATAGCTGGGAAATCAATC |
| SIRT5-2-F | 5'-CCGGGAGATCCATGGTAGCTTATTTCTCGAGAAATAAGCTACCATGGATCTCTTTTTG |
| SIRT5-2-R | 5'-AATTCAAAAAGAGATCCATGGTAGCTTATTTCTCGAGAAATAAGCTACCATGGATCTC |
| SUCLG2-1-F | 5'-CCGGGCCAGGCTGCAGATCAAATTACTCGAGTAATTTGATCTGCAGCCTGGCTTTTTG-3' |
| SUCLG2-1-R | 5'-AATTCAAAAAGCCAGGCTGCAGATCAAATTACTCGAGTAATTTGATCTGCAGCCTGGC-3' |
| SUCLG2-2-F | 5'-CCGGTGGCTGAACCTGCAGGAATACCTCGAGGTATTCCTGCAGGTTCAGCCATTTTTG-3' |
| SUCLG2-2-R | 5'-AATTCAAAAATGGCTGAACCTGCAGGAATACCTCGAGGTATTCCTGCAGGTTCAGCCA-3' |

Table S1. All primer sequence information mentioned in this article.
