# Supplementary material
Source: Research Square preprint supplement (doi:10.21203/rs.3.rs-9612899/v1)

Fig.S2

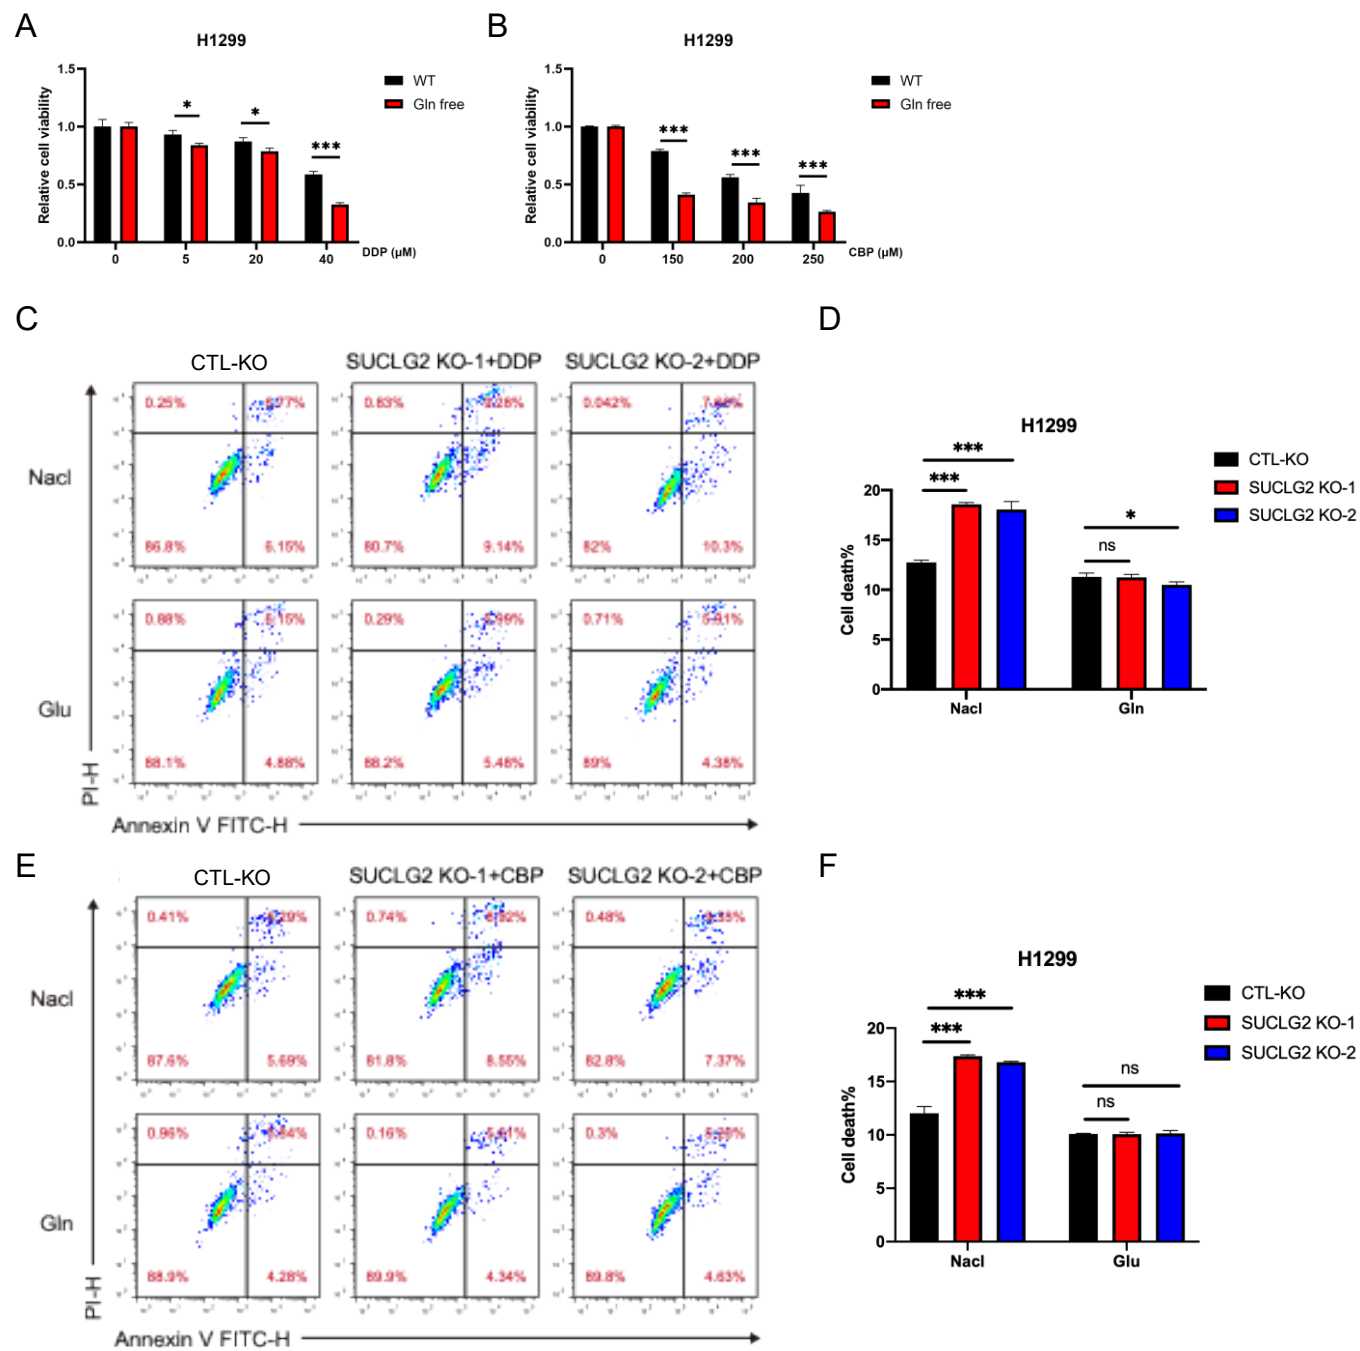

Supplement: Supplementary file 2 [file 1ceffa82635d43fceb62a776.pdf]

Fig.S1

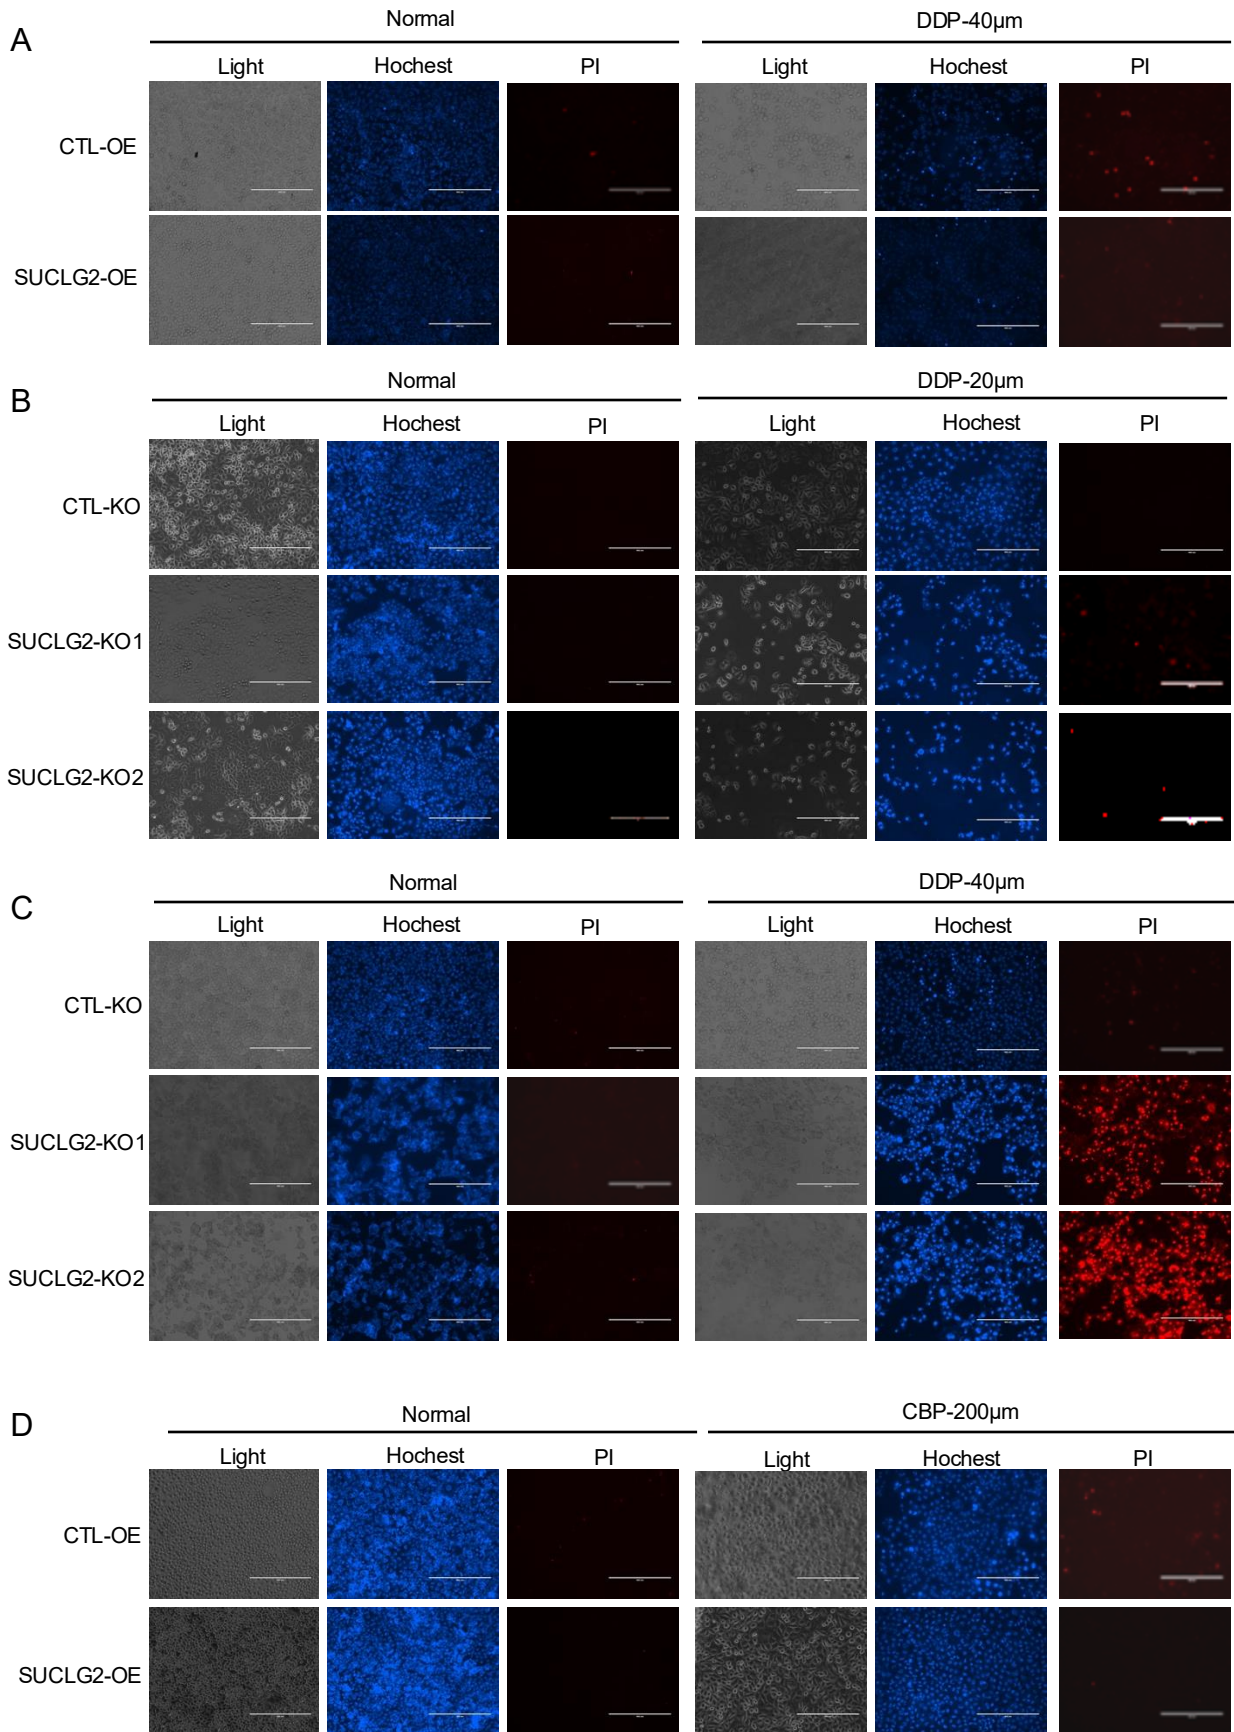

Fig.S1

E

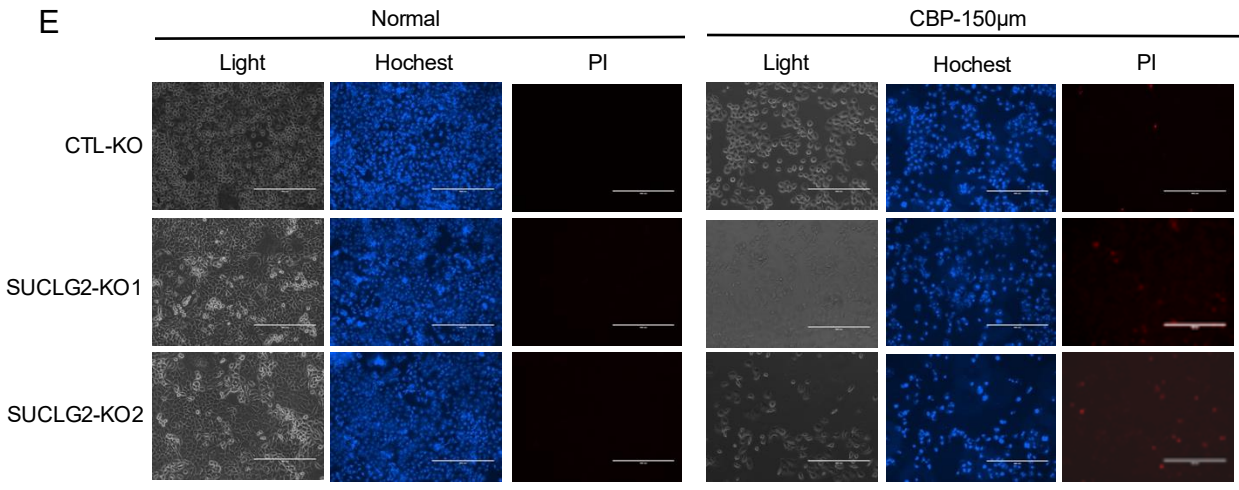

F

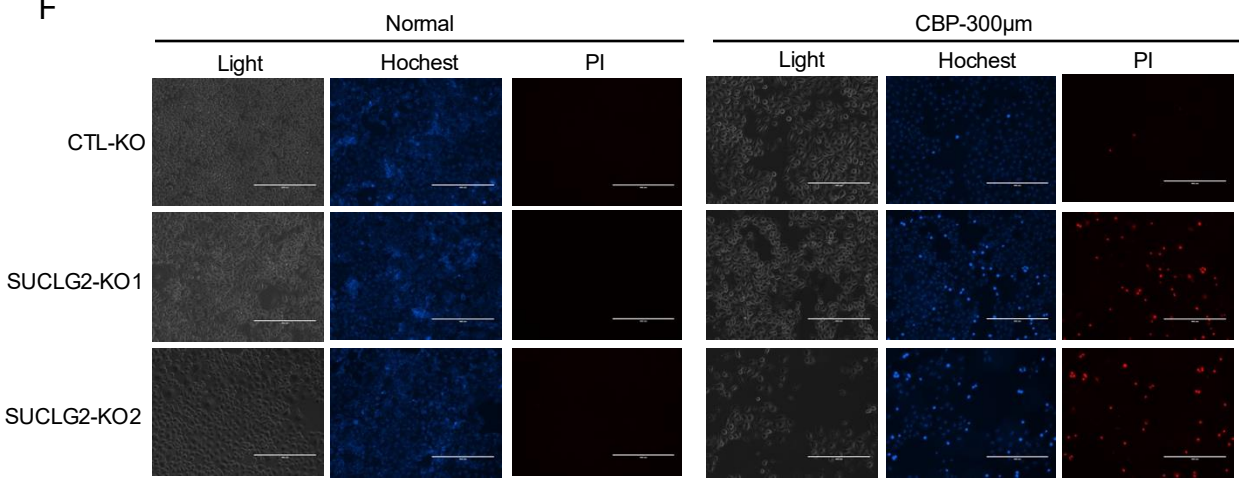

Supplement: Supplementary file 3 [file 597a1c8be01613422ce423aa.pdf]

Fig.S3

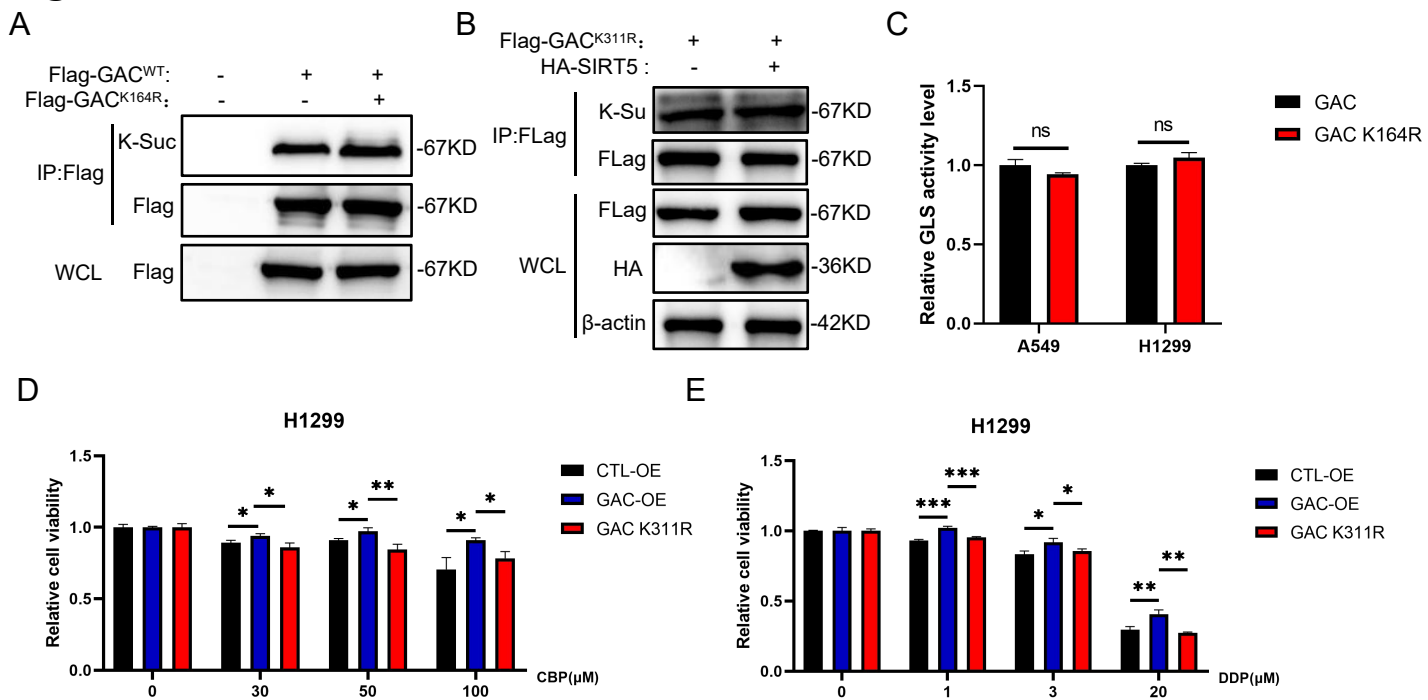

Supplement: Supplementary file 5 [file ec4517c095aa79378ada68b6.pdf]
